# Supplementary material for: Co-adsorption of peptide amphiphile V6K and conventional surfactants SDS and C12TAB at the solid/water interface
Source: Royal Society of Chemistry journal article supplement (doi:10.1039/c5sm01670c), 2015-01-01
Supplement: c5sm01670c1.pdf [file c5sm01670c1.pdf]

## Supporting Information

### ***Co-adsorption between peptide surfactant V<sub>6</sub>K and conventional surfactants SDS and C<sub>12</sub>TAB***

Dharana Jayawardane, Fang Pan, Jian R. Lu, Xiubo Zhao

**Figure S1**

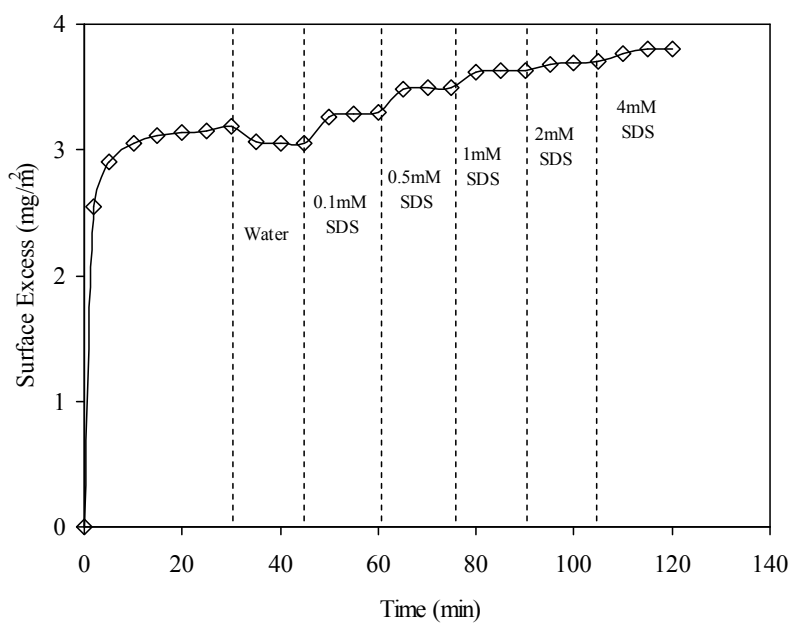

**Figure S1.** Ellipsometry data showing the adsorption of V<sub>6</sub>K (100 μg/ml, pH 7) at the silica/water interface and washed by water and different concentrations of SDS (from 0.1 mM to 4 mM).

**Figure S2**

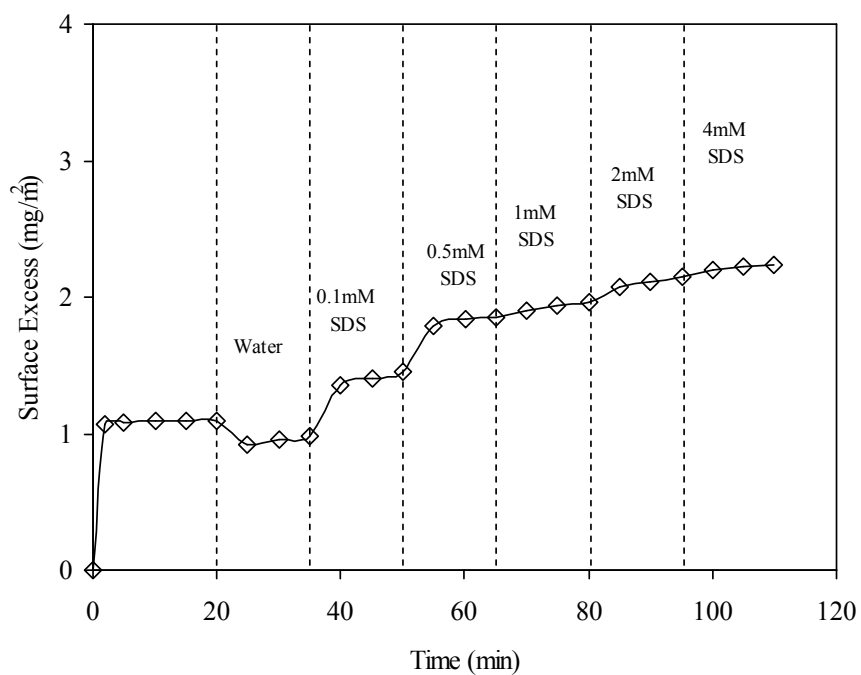

**Figure S2.** Ellipsometry data showing the adsorption of  $V_6K$  ( $100 \mu\text{g/ml}$ ,  $\text{pH } 7$ ) at  $C_8/\text{water}$  interface and washed by water and different concentration of SDS (from  $0.1 \text{ mM}$  to  $4 \text{ mM}$ ).

**Figure S3**

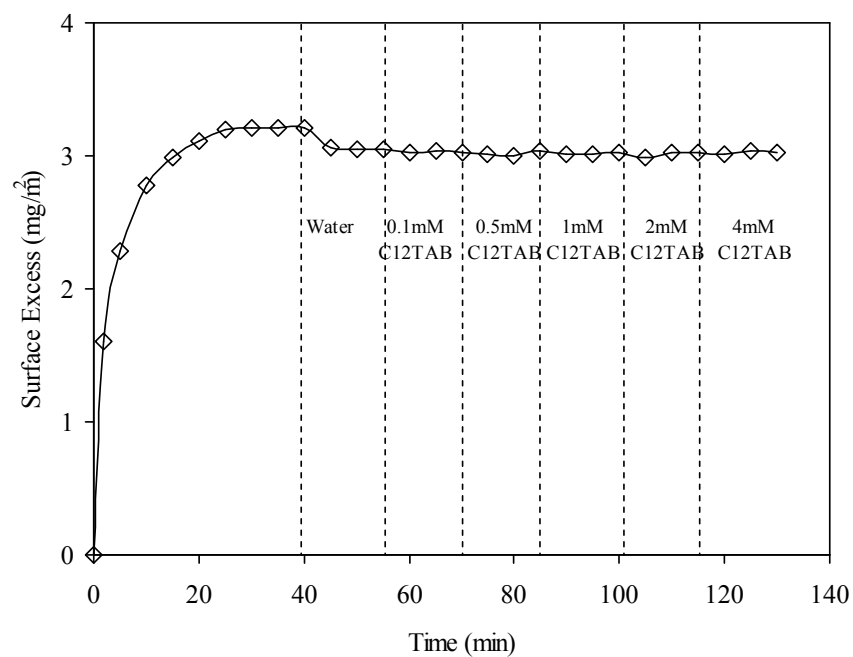

**Figure S3.** Ellipsometry data showing the adsorption isotherm of V<sub>6</sub>K (100 µg/ml, pH 7) at silica/water interface and washed by water and different concentration of C<sub>12</sub>TAB (from 0.1 mM to 4 mM).

**Figure S4**

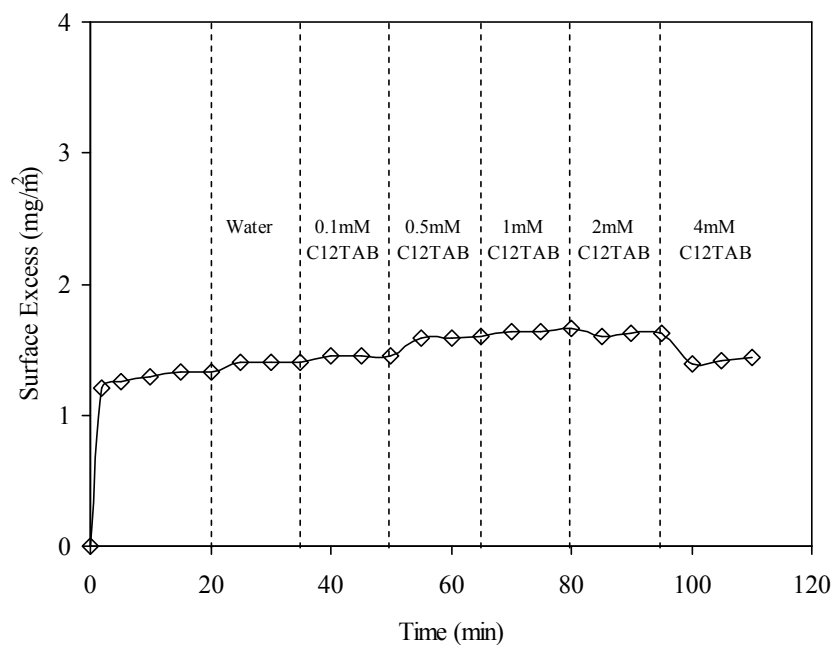

**Figure S4.** Ellipsometry data showing the adsorption of  $V_6K$  ( $100 \mu\text{g/ml}$ ,  $\text{pH } 7$ ) at  $C_8$ /water interface and washed by water and different concentration of  $C_{12}TAB$  (from  $0.1 \text{ mM}$  to  $4 \text{ mM}$ ).
